# Supplementary material for: An effective strategy to obtain near-infrared emission from shoulder to shoulder-type binuclear platinum(ii) complexes based on fused pyrene core bridged isoquinoline ligands
Source: Royal Society of Chemistry journal article supplement (doi:10.1039/d0tc05397j), 2021-01-01
Supplement: d0tc05397j1.pdf [file d0tc05397j1.pdf]

*Supporting Information*

**An effective strategy to obtain near-infrared emission from shoulder  
to shoulder-type binuclear platinum(II) complex based on fused  
pyrene core bridged isoquinoline ligands**

KaiZhang,<sup>a</sup> Tianyu Wang,<sup>a</sup> Tingwen Wu,<sup>b\*</sup> Zhenming Ding,<sup>a</sup>  
Qiang Zhang,<sup>a</sup> Weiguo Zhu,<sup>a\*</sup> and Yu Liu<sup>a\*</sup>

<sup>a</sup> *School of Materials Science and Engineering, Jiangsu Collaboration Innovation  
Center of Photovoltaic Science and Engineering, Jiangsu Engineering Laboratory of  
Light-Electricity-Heat Energy-Converting Materials and Applications, National  
Experimental Demonstration Center for Materials Science and Engineering,  
Changzhou University, Changzhou 213164, P. R. China*

<sup>b</sup> *Shenzhen CNOOC EnerTech-Marketing Services Co. Ltd. Shenzhen 518067, P. R.  
China*

E-mail: wutw@cnooc.com.cn

(W. Zhu) [zhuwg18@126.com](mailto:zhuwg18@126.com)

(Y. Liu) [liuyu03b@126.com](mailto:liuyu03b@126.com)

## Contents

**Scheme S1.** Synthetic route of platinum( II ) complexes.

**Figure S1-2.**  $^1\text{H}$  NMR Spectra of platinum( II ) complexes.

**Figure S3-4.** MALDI-TOF MS spectrum of platinum( II ) complexes.

**Figure S5.** TGA curves of platinum( II ) complexes under  $\text{N}_2$  with a rate of  $20\text{ }^\circ\text{C}/\text{min}$ .

**Figure S6.** Cyclic voltammograms of platinum( II ) complexes in  $\text{CH}_3\text{CN}$  solutions.

**Figure S7.** Iso-surface contour plots (iso-value = 0.02) of selected orbitals of model (BIQPy)Pt(DPM) in the ground state ( $\text{S}_0$ ) geometry.

**Figure S8.** Iso-surface contour plots (iso-value = 0.02) of selected orbitals of model (BIQPy)[Pt(DPM)]<sub>2</sub> in the ground state ( $\text{S}_0$ ) geometry.

**Figure S9.** EL spectra of (BIQPy)Pt(DPM)<sub>2</sub> doped devices at various concentrations from 1 to 4 wt %.

**Figure S10.** EL spectra of (BIQPy)[Pt(DPM)]<sub>2</sub> doped devices at various concentrations from 1 to 4 wt %.

**Figure S11.**  $J-V-R$  profiles of platinum( II ) complexes doped devices at various concentrations from 1 to 4 wt %.

**Figure S12.**  $EQE-J$  characteristics of platinum( II ) complexes doped devices at various concentrations from 1 to 4wt %.

**Figure S13.** Atomic force microscopy (AFM) measurement of the two complexes based on emissive blends at concentrations of 2 wt %.

**Table S1.** Crystal data and refinement parameters for (BIQPy)[Pt(DPM)]<sub>2</sub>.

**Table S2.** Excited state properties of (BIQPy)Pt(DPM) (1) and (BIQPy)[Pt(DPM)]<sub>2</sub> (2) obtained from TD-DFT calculations carried out at the ground state( $\text{S}_0$ ) geometry.

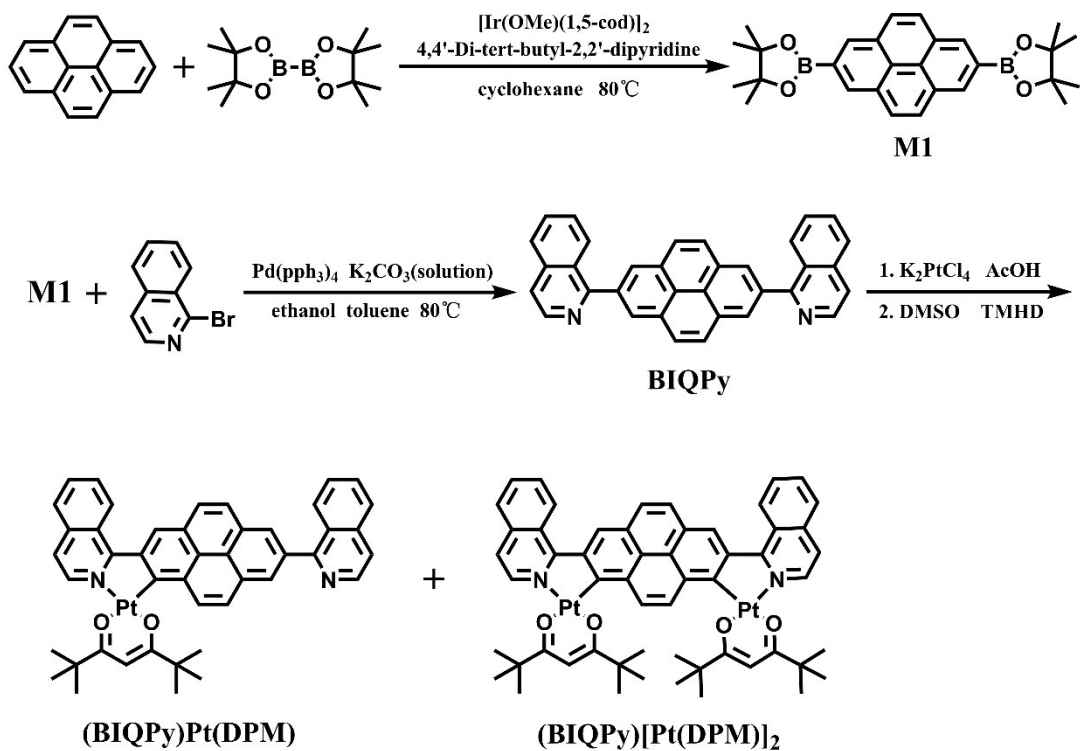

Scheme S1. Synthetic route of platinum( II ) complexes.

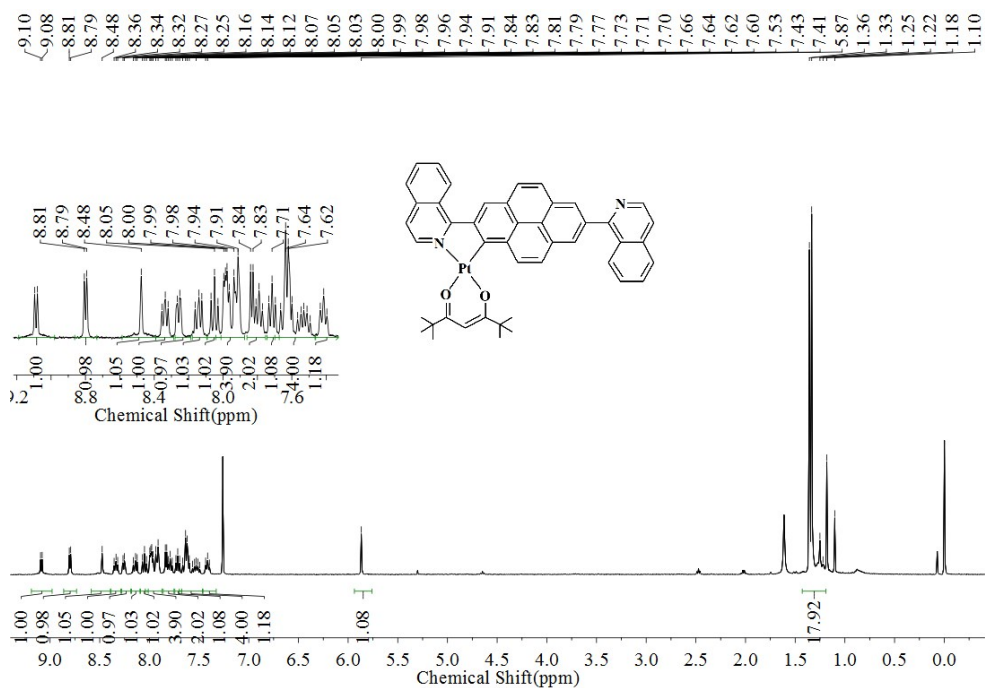

**Figure S1.**  $^1\text{H}$  NMR spectrum of (BIQPy)Pt(DPM).

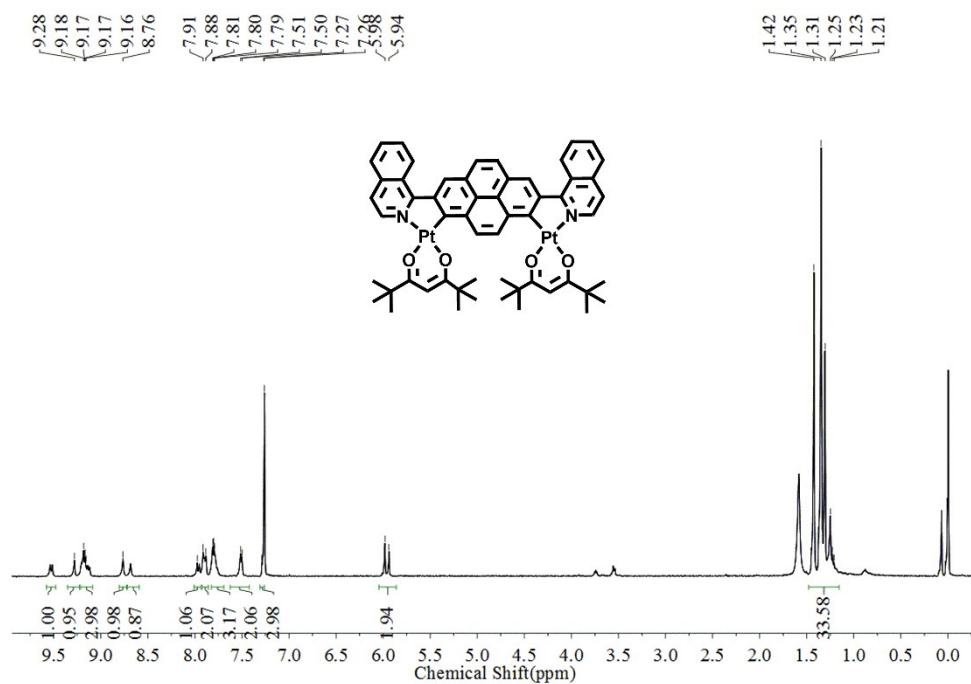

**Figure S2.**  $^1\text{H}$  NMR spectrum of (BIQPy)[Pt(DPM)]<sub>2</sub>.

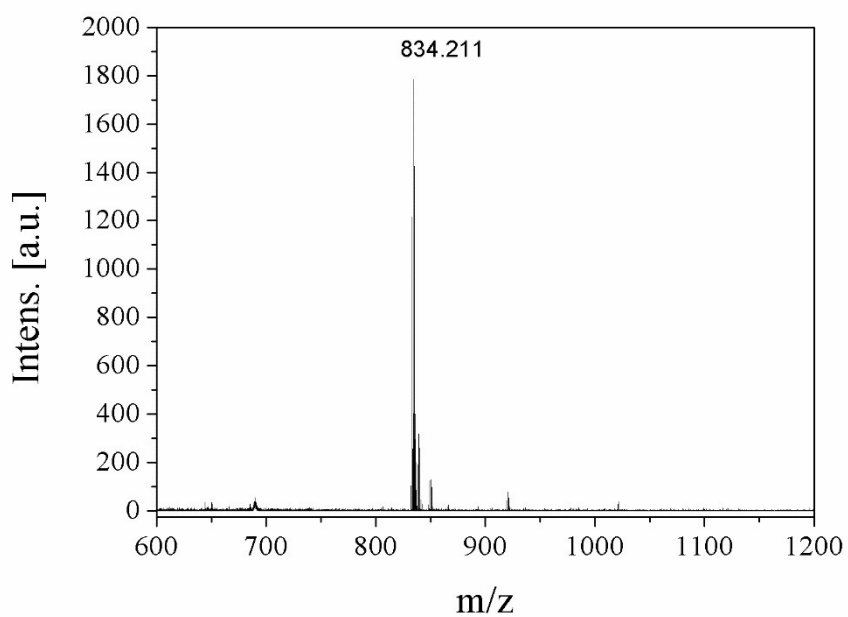

**Figure S3.** High resolution MS spectrum of (BIQPy)Pt(DPM).

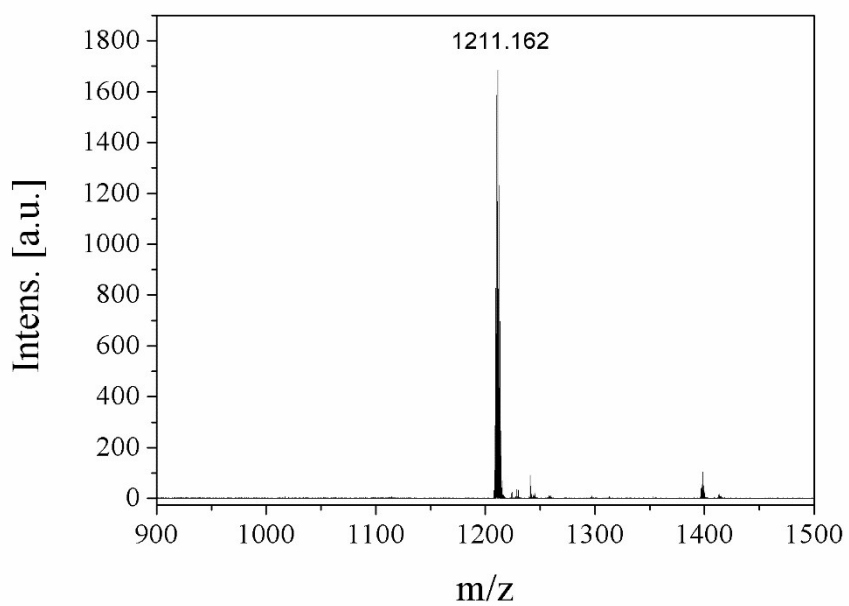

**Figure S4.** MALDI-TOF MS spectrum of (BIQPy)[Pt(DPM)]<sub>2</sub>.

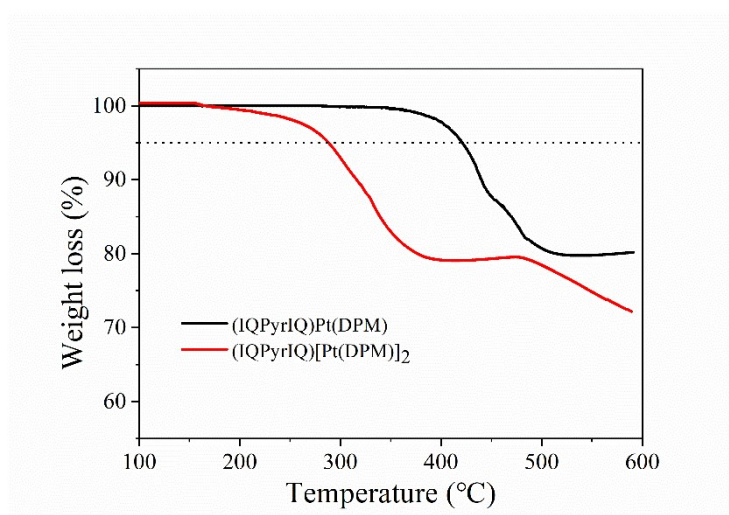

**Figure S5.** TGA curves of Pt(II) complexes under N<sub>2</sub> with a rate of 20 °C/min.

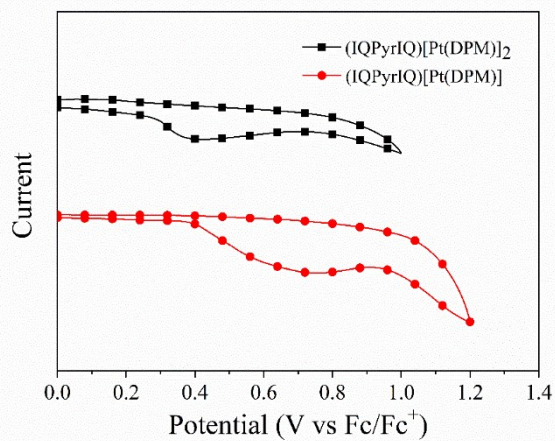

**Figure S6.** Cyclic voltammograms of Pt(II) complexes in CH<sub>3</sub>CN solutions.

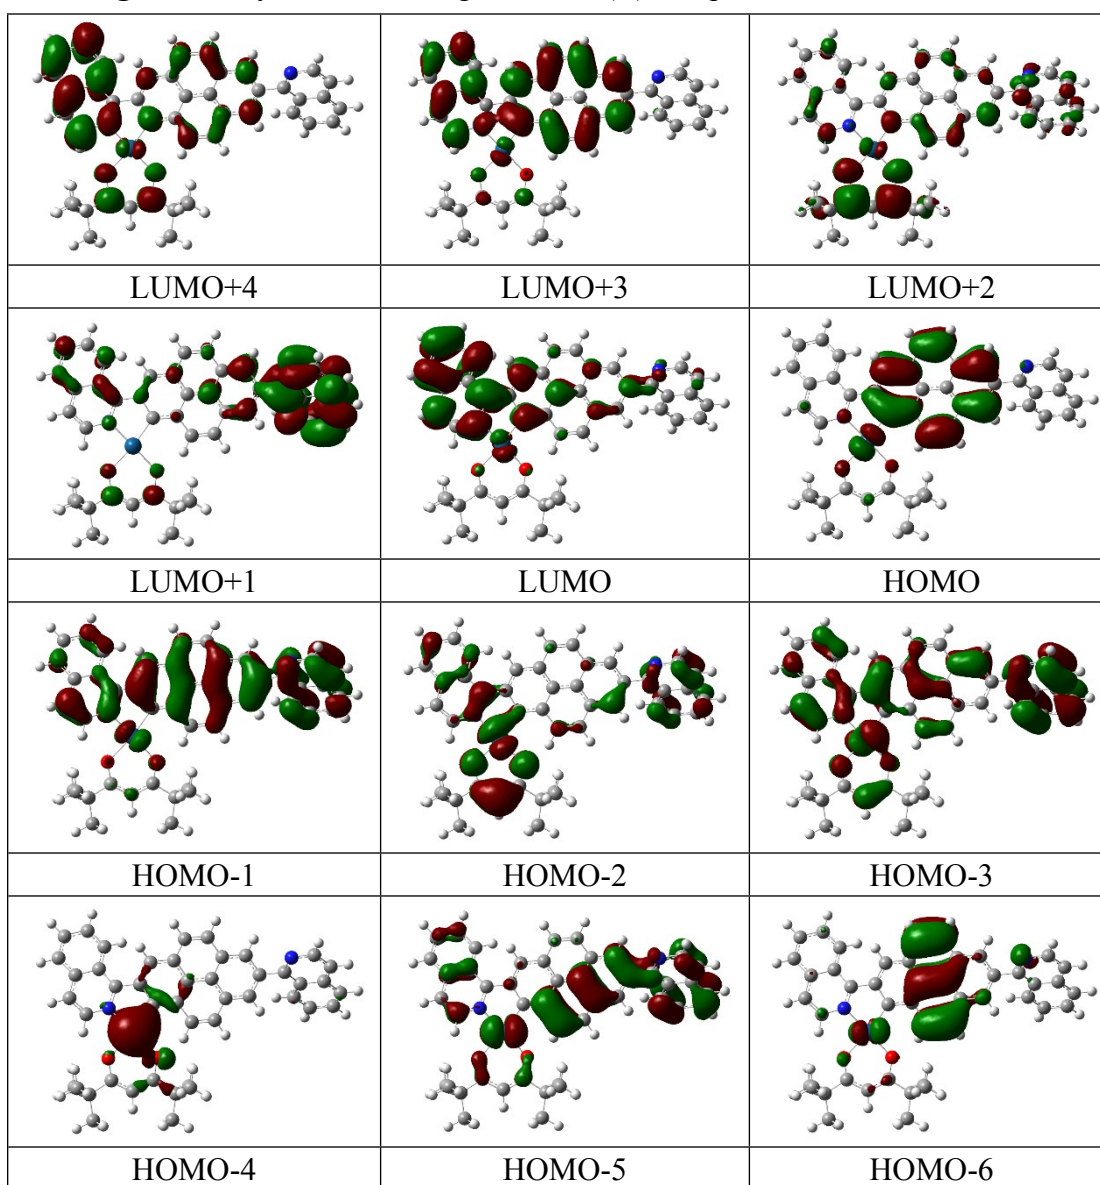

**Figure S7.** Iso-surface contour plots (iso-value = 0.02) of selected orbitals of model



(BIQPy)Pt(DPM) in the ground state ( $S_0$ ) geometry.

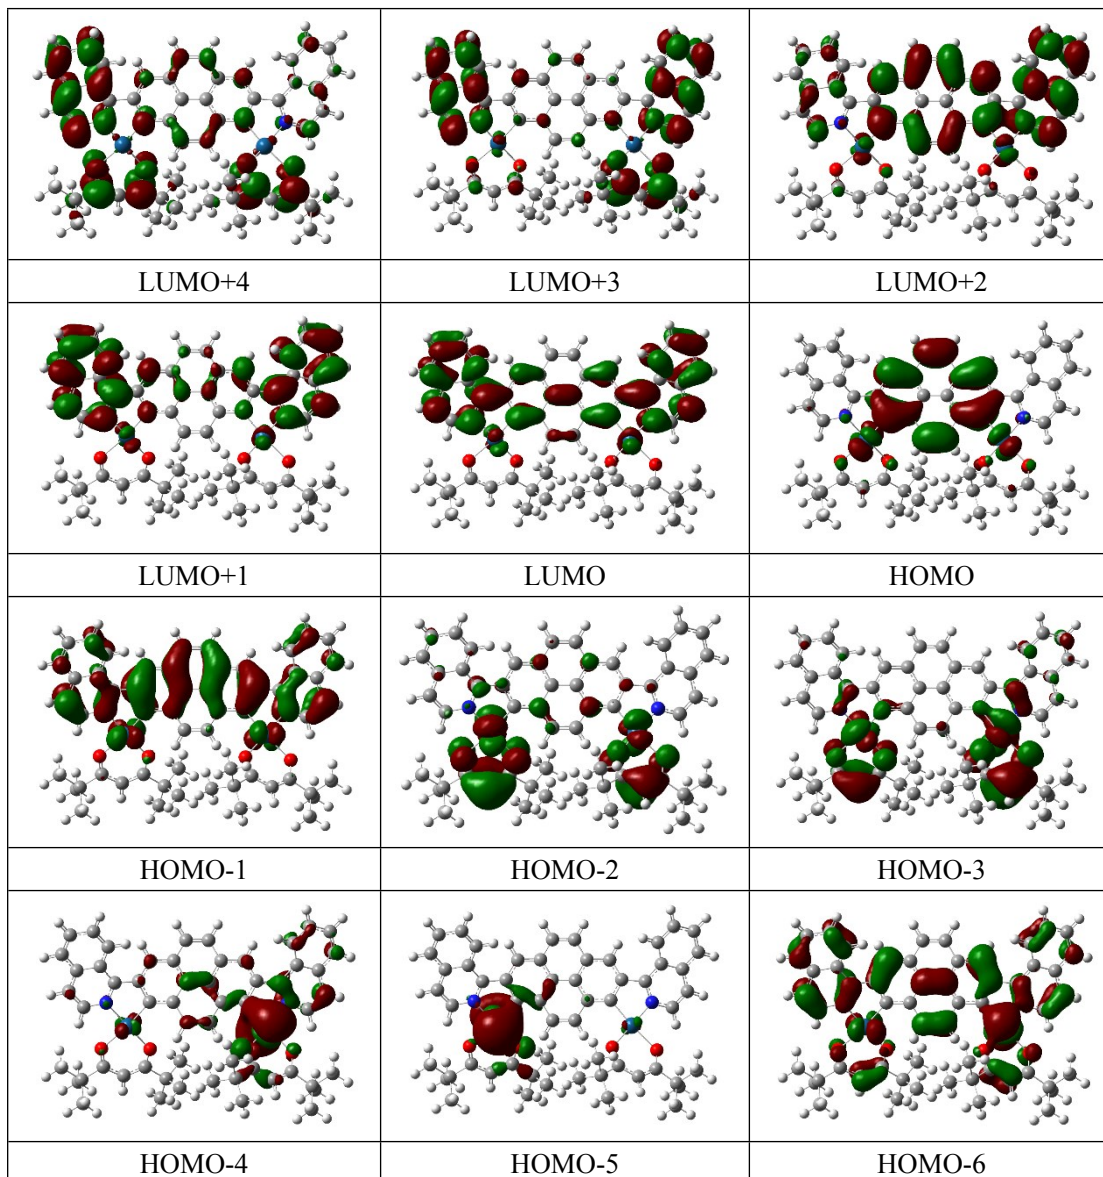

**Figure S8.** Iso-surface contour plots (iso-value = 0.02) of selected orbitals of model (BIQPy)[Pt(DPM)]<sub>2</sub> in the ground state ( $S_0$ ) geometry.

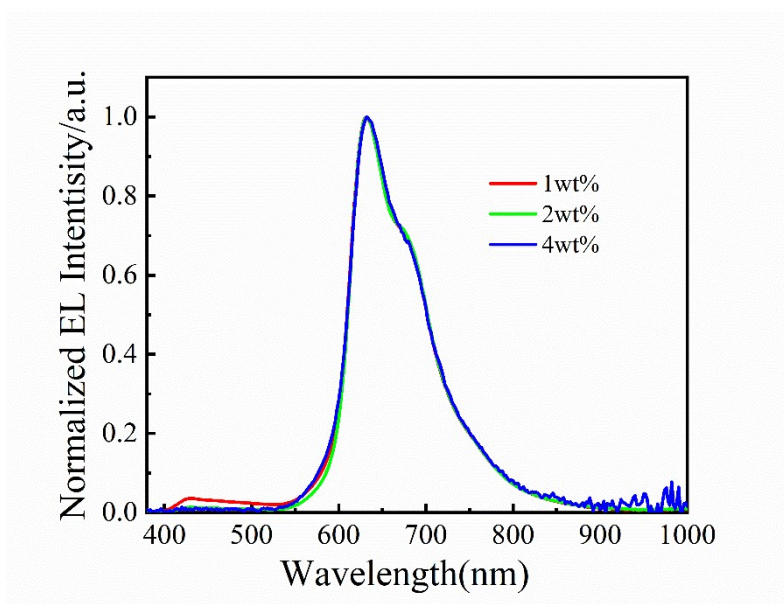

**Figure S9.** EL spectra of (BIQPy)Pt(DPM)<sub>2</sub> doped devices at various concentrations from 1 to 4 wt %.

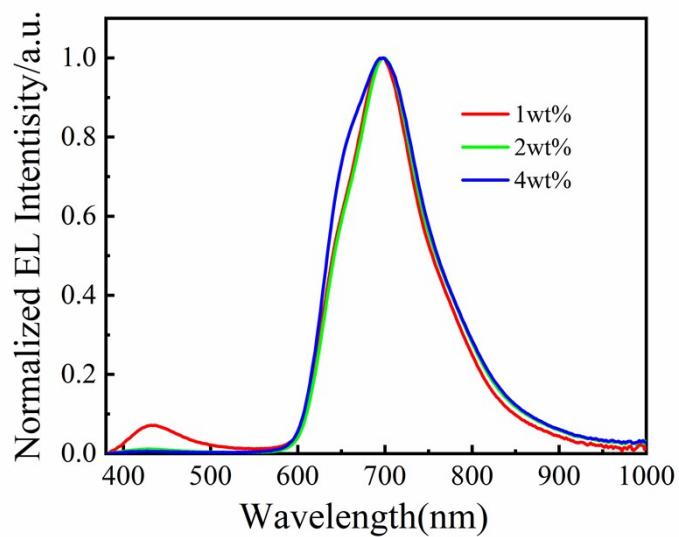

**Figure S10.** EL spectra of (BIQPy)[Pt(DPM)]<sub>2</sub> doped devices at various concentrations from 1 to 4 wt %.



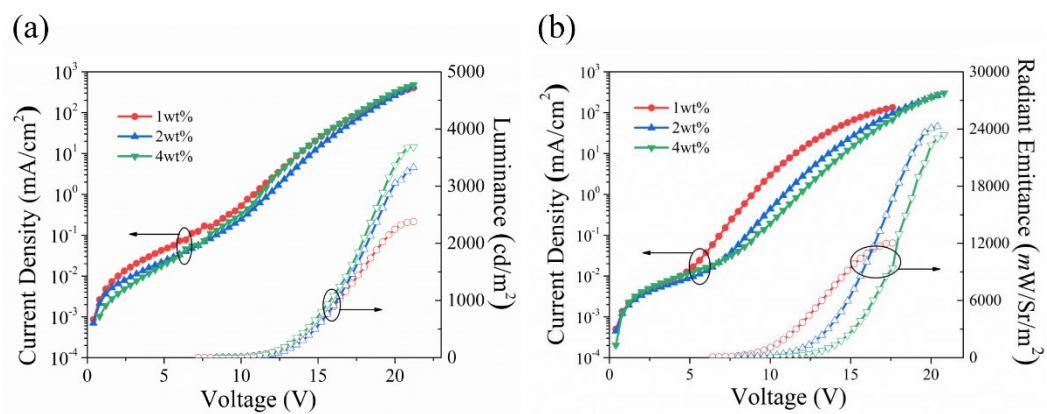

**Figure S11.**  $J$ - $V$ - $R$  profiles of platinum(II) complexes doped devices at various concentrations from 1 to 4 wt %.

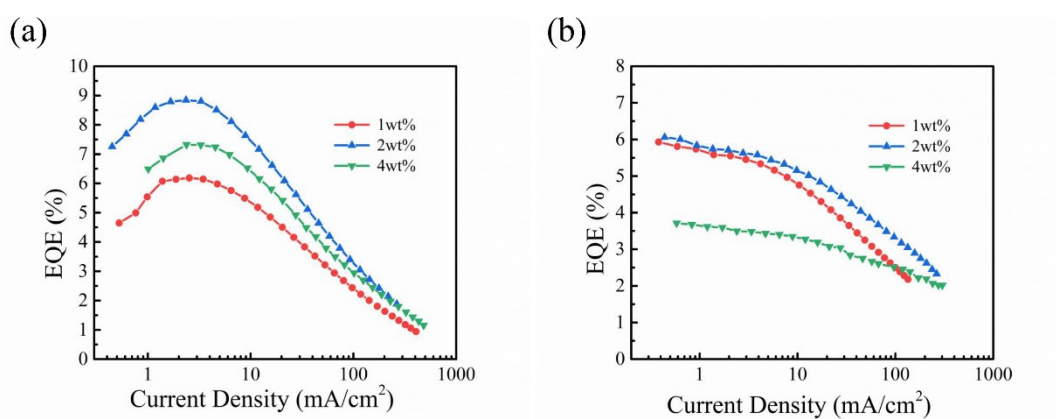

**Figure S12.**  $EQE$ - $J$  characteristics of platinum(II) complexes doped devices at various concentrations from 1 to 4wt %.

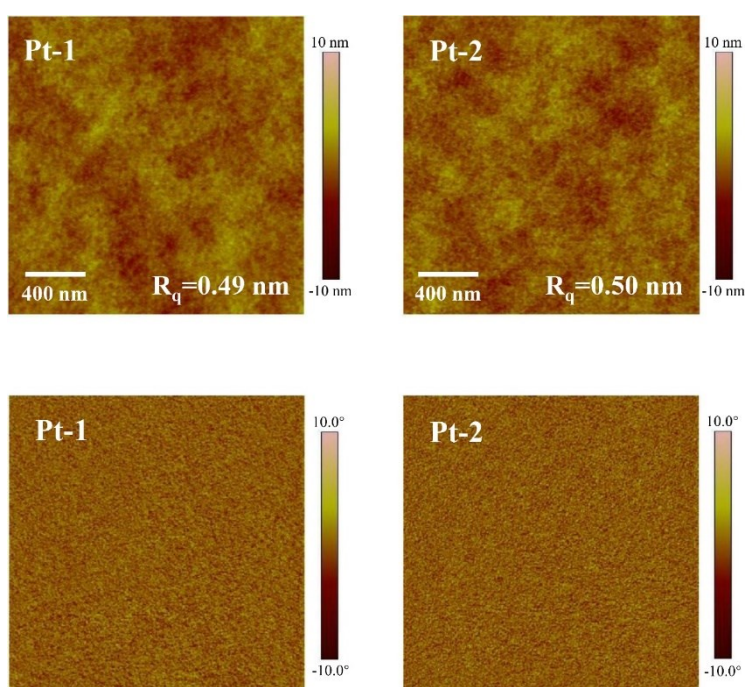

**Figure S13.** Atomic force microscopy (AFM) measurement of the two complexes based on emissive blends at concentrations of 2 wt %. Height images (top) and phase images (bottom) ( $2\ \mu\text{m} \times 2\ \mu\text{m}$ ), (BIQPy)Pt(DPM) and (BIQPy)[Pt(DPM)]<sub>2</sub> replaced with Pt-1 and Pt-2, respectively.

**Table S1.** Crystal data and refinement parameters for (BIQPy)[Pt(DPM)]<sub>2</sub>.

|                                             |                                                                               |
|---------------------------------------------|-------------------------------------------------------------------------------|
| Sample                                      | (BIQPy)[Pt(DPM)] <sub>2</sub>                                                 |
| Empirical formula                           | C <sub>56</sub> H <sub>56</sub> N <sub>2</sub> O <sub>4</sub> Pt <sub>2</sub> |
| Formula weight                              | 1211.20                                                                       |
| Temperature/K                               | 170                                                                           |
| Crystal system                              | monoclinic                                                                    |
| Space group                                 | P2 <sub>1</sub> /c                                                            |
| a/Å                                         | 19.4459(11)                                                                   |
| b/Å                                         | 9.2887(5)                                                                     |
| c/Å                                         | 28.9527(16)                                                                   |
| $\alpha$ /°                                 | 90                                                                            |
| $\beta$ /°                                  | 92.182(2)                                                                     |
| $\gamma$ /°                                 | 90                                                                            |
| Volume/Å <sup>3</sup>                       | 5225.9(5)                                                                     |
| Z                                           | 4                                                                             |
| $\rho_{\text{calc}}/\text{cm}^3$            | 1.539                                                                         |
| $\mu/\text{mm}^{-1}$                        | 5.392                                                                         |
| F(000)                                      | 2376.0                                                                        |
| Crystal size/mm <sup>3</sup>                | 0.12 × 0.08 × 0.05                                                            |
| Radiation                                   | MoK $\alpha$ ( $\lambda = 0.71073$ )                                          |
| 2 $\theta$ range for data collection/°      | 4.192 to 52.074                                                               |
| Index ranges                                | -23 ≤ h ≤ 24, -10 ≤ k ≤ 11, -32 ≤ l ≤ 35                                      |
| Reflections collected                       | 35423                                                                         |
| Independent reflections                     | 10167 [R <sub>int</sub> = 0.0657, R <sub>sigma</sub> = 0.0662]                |
| Data/restraints/parameters                  | 10167/50/619                                                                  |
| Goodness-of-fit on F <sup>2</sup>           | 1.035                                                                         |
| Final R indexes [I ≥ 2 $\sigma$ (I)]        | R1 = 0.0370, wR2 = 0.0754                                                     |
| Final R indexes [all data]                  | R1 = 0.0609, wR2 = 0.0903                                                     |
| Largest diff. peak/hole / e Å <sup>-3</sup> | 1.32/-1.41                                                                    |

**Table S2.** Excited state properties of (BIQPy)Pt(DPM) (Pt-1) and (BIQPy)[Pt(DPM)]<sub>2</sub> (Pt-2) obtained from TD-DFT calculations carried out at the ground state(S<sub>0</sub>) geometry.

| Complex | State (E, λ)                   | Dominant excitations                                                                                         | Oscillator strength | Character                                                            |
|---------|--------------------------------|--------------------------------------------------------------------------------------------------------------|---------------------|----------------------------------------------------------------------|
| Pt-1    | S <sub>1</sub> (2.18eV, 568nm) | HOMO→LUMO(97.87)                                                                                             | 0.038               | ILCT/MLCT/LE                                                         |
|         | S <sub>2</sub> (2.93eV, 422nm) | HOMO-1→LUMO(79.42)<br>HOMO→LUMO+2(6.70)                                                                      | 0.1415              | ILCT/LE/LLCT<br>LLCT/ILCT                                            |
|         | S <sub>3</sub> (2.99eV, 413nm) | HOMO→LUMO+1(92.80)                                                                                           | 0.0140              | ILCT/MLCT/LLCT                                                       |
|         | S <sub>4</sub> (3.05eV, 407nm) | HOMO→LUMO+2(85.69)<br>HOMO→LUMO+3(7.23)                                                                      | 0.0524              | LLCT/ILCT<br>LE/ILCT                                                 |
|         | S <sub>5</sub> (3.15eV, 393nm) | HOMO-4→LUMO(90.88)<br>HOMO-3→LUMO(4.33)                                                                      | 0.0028              | MLCT/MC<br>LE/ILCT/LLCT                                              |
|         | T <sub>1</sub> (1.89eV, 655nm) | HOMO-1→LUMO(4.31)<br>HOMO→LUMO(87.26)                                                                        | triplet             | ILCT/LE/LLCT<br>ILCT/MLCT/LE                                         |
|         | T <sub>2</sub> (2.02eV, 612nm) | HOMO-1→LUMO(13.96)<br>HOMO→LUMO(7.07)<br>HOMO→LUMO+2(10.75)<br>HOMO→LUMO+3(45.29)<br>HOMO→LUMO+4(9.23)       | triplet             | ILCT/LE/LLCT<br>ILCT/MLCT/LE<br>LLCT/ILCT<br>LE/ILCT<br>ILCT/LLCT/LE |
|         | T <sub>3</sub> (2.32eV, 534nm) | HOMO-3→LUMO(10.75)<br>HOMO-2→LUMO(10.68)<br>HOMO-1→LUMO(40.75)<br>HOMO→LUMO+3(14.01)                         | triplet             | LE/ILCT/LLCT<br>LLCT/LE<br>ILCT/LE/LLCT<br>LE/ILCT                   |
|         | T <sub>4</sub> (2.60eV, 477nm) | HOMO-3→LUMO(5.07)<br>HOMO-3→LUMO+1(20.68)<br>HOMO-2→LUMO+1(6.78)<br>HOMO-1→LUMO+1(34.07)                     | triplet             | LE/ILCT/LLCT<br>LE/LMCT<br>LE/LLCT/MLCT<br>LE/ILCT                   |
|         | T <sub>5</sub> (2.77eV, 447nm) | HOMO-3→LUMO+2(5.87)<br>HOMO-2→LUMO+2(25.20)<br>HOMO→LUMO+1(13.63)<br>HOMO→LUMO+2(27.70)<br>HOMO→LUMO+3(5.63) | triplet             | LE/LLCT/MLCT<br>LE/MLCT<br>ILCT/MLCT/LLCT<br>LLCT/ILCT<br>LE/ILCT    |
| Pt-2    | S <sub>1</sub> (1.83eV, 677nm) | HOMO→LUMO(98.50)                                                                                             | 0.0442              | ILCT/LE/MLCT                                                         |
|         | S <sub>2</sub> (2.16eV, 575nm) | HOMO→LUMO+1(98.25)                                                                                           | 0.0008              | ILCT                                                                 |
|         | S <sub>3</sub> (2.79eV, 445nm) | HOMO-1→LUMO(85.61)<br>HOMO→LUMO+2(7.58)                                                                      | 0.2321              | LE/ILCT/LLCT<br>LE/ILCT                                              |
|         | S <sub>4</sub> (2.96eV, 419nm) | HOMO-4→LUMO(7.50)<br>HOMO-2→LUMO(74.67)<br>HOMO→LUMO+4(11.71)                                                | 0.0017              | MLCT<br>ILCT/LLCT<br>ILCT/LLCT                                       |
|         | S <sub>5</sub> (2.97eV, 418nm) | HOMO→LUMO+2(16.86)<br>HOMO→LUMO+3(80.83)                                                                     | 0.0123              | LE/ILCT<br>LLCT/ILCT                                                 |
|         | T <sub>1</sub> (1.55eV, 801nm) | HOMO→LUMO(96.06)                                                                                             | triplet             | ILCT/LE/MLCT                                                         |
|         | T <sub>2</sub> (1.91eV, 648nm) | HOMO-1→LUMO(23.90)<br>HOMO→LUMO+2(40.48)                                                                     | triplet             | LE/ILCT<br>LE/ILCT                                                   |

|  |                                |                                                                 |         |                            |
|--|--------------------------------|-----------------------------------------------------------------|---------|----------------------------|
|  |                                | HOMO→LUMO+3(8.90)                                               |         | LLCT/ILCT                  |
|  | T <sub>3</sub> (1.97eV, 631nm) | HOMO→LUMO+1(90.49)                                              | triplet | ILCT                       |
|  | T <sub>4</sub> (2.26eV, 548nm) | HOMO-4→LUMO+1(8.95)<br>HOMO-1→LUMO(49.33)<br>HOMO→LUMO+2(19.40) | triplet | MLCT<br>LE/ILCT<br>LE/ILCT |
|  | T <sub>5</sub> (2.32eV, 534nm) | HOMO-4→LUMO(34.19)<br>HOMO-1→LUMO+1(37.80)                      | triplet | MLCT<br>LE/LLCT            |
